# Supplementary material
Source: Springer Nature journal article supplement (https://www.springermedizin.de/resource/supplementary/12913_2013_2988_MOESM3_ESM.pdf/9532628)

# Average yearly costs of one type 1 and type 2 diabetic patient (€ in 2010 prices)

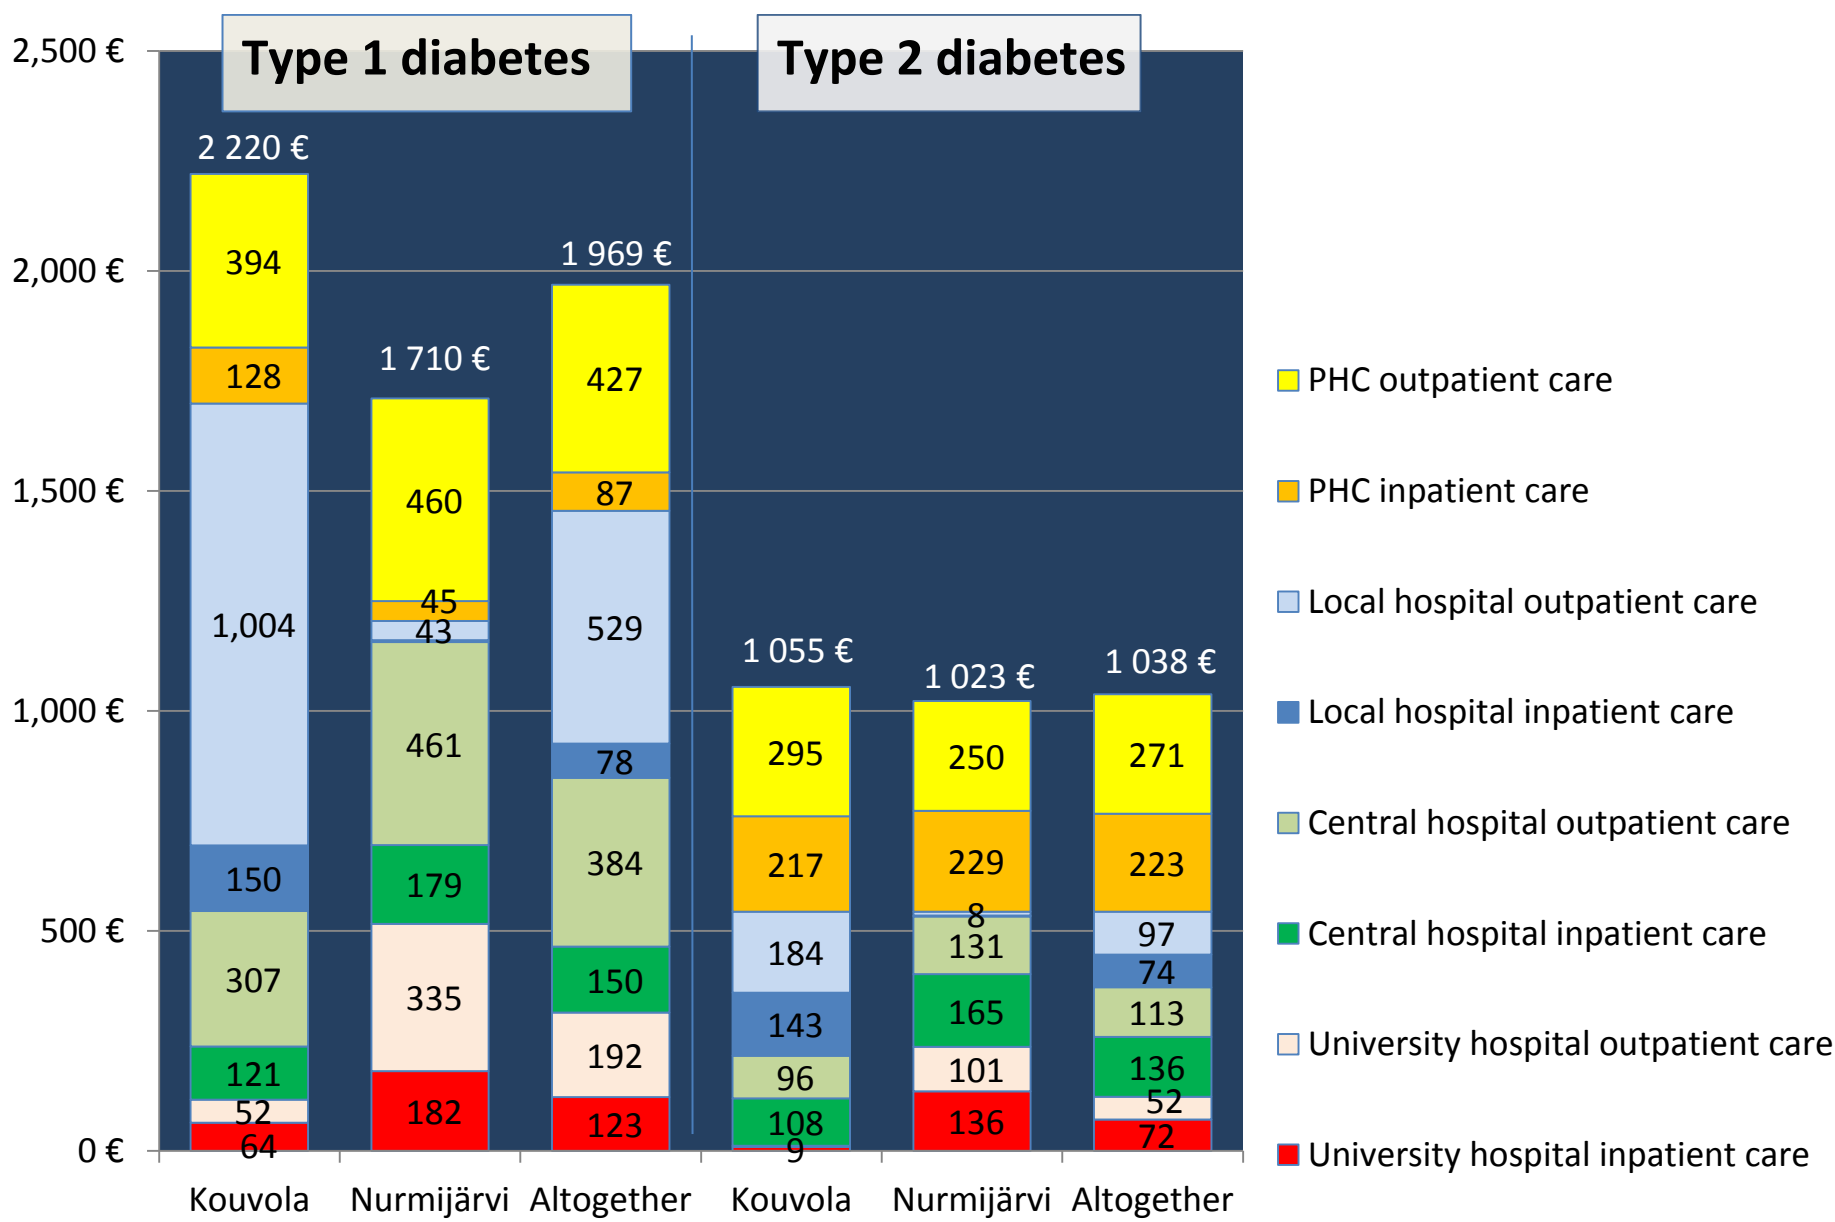

Supplement: MOESM3 [file 9532628]
